# Supplementary material
Source: PubMed Central journal article supplement (PMC4787689)
Supplement: skod791947.ww1_default.pdf [file skod791947.ww1_default.pdf]

## Appendix A. Pandemic H1N1 vaccine sequencing by participating provinces with roll out beginning on the specified dates\*

|                               | British Columbia                                                                                                                                                                                                                                                                                       | Alberta                                                                                                                                                                                                                                                                                                                                                                                                                                                                                                                                                                                                                                                       | Ontario                                                                                                                                                                                                                                                                                                                                                                                    | Quebec                                                                                                                                                                                                                       |
|-------------------------------|--------------------------------------------------------------------------------------------------------------------------------------------------------------------------------------------------------------------------------------------------------------------------------------------------------|---------------------------------------------------------------------------------------------------------------------------------------------------------------------------------------------------------------------------------------------------------------------------------------------------------------------------------------------------------------------------------------------------------------------------------------------------------------------------------------------------------------------------------------------------------------------------------------------------------------------------------------------------------------|--------------------------------------------------------------------------------------------------------------------------------------------------------------------------------------------------------------------------------------------------------------------------------------------------------------------------------------------------------------------------------------------|------------------------------------------------------------------------------------------------------------------------------------------------------------------------------------------------------------------------------|
| Week 43<br>Oct 25-31,<br>2009 | <b>October 26</b> <ul style="list-style-type: none"> <li>• People &lt; 65 yoa with chronic conditions</li> <li>• Women in the second half of pregnancy and any pregnant women with chronic conditions</li> <li>• Residents of remote and isolated communities</li> </ul>                               | <b>October 26</b> <ul style="list-style-type: none"> <li>• General campaign started but halted October 31 to enable sequencing</li> </ul>                                                                                                                                                                                                                                                                                                                                                                                                                                                                                                                     | <b>October 26</b> <ul style="list-style-type: none"> <li>• People &lt; 65 yoa with chronic conditions</li> <li>• Pregnant women</li> <li>• Healthy children 6 moa to &lt; 5 yoa</li> <li>• Residents of remote and isolated communities</li> <li>• HCW</li> <li>• Household contacts and care providers of persons at high risk who may not mount their own response to vaccine</li> </ul> | <b>October 26</b> <ul style="list-style-type: none"> <li>• HCW</li> </ul>                                                                                                                                                    |
| Week 44<br>Nov 1-7,<br>2009   | <b>November 2</b> <ul style="list-style-type: none"> <li>• Children 6 moa to &lt; 5 yoa</li> <li>• Household contacts (&lt; 65 yoa) of infants &lt; 6 moa and of immuno-compromised people</li> <li>• HCW delivering critical care (i.e. Emergency Room, Intensive Care, specialized units)</li> </ul> | <b>November 5</b> <ul style="list-style-type: none"> <li>• Children 6 moa to &lt; 5 yoa</li> <li>• HCW with direct patient contact</li> </ul> <b>November 6</b> <ul style="list-style-type: none"> <li>• Pregnant women</li> </ul>                                                                                                                                                                                                                                                                                                                                                                                                                            |                                                                                                                                                                                                                                                                                                                                                                                            | <b>November 2</b> <ul style="list-style-type: none"> <li>• Children 6 moa to 4 yoa</li> <li>• Families of infants &lt; 6 moa</li> </ul> <b>November 6</b> <ul style="list-style-type: none"> <li>• Pregnant women</li> </ul> |
| Week 45<br>Nov 8-14,<br>2009  | <b>November 9</b> <ul style="list-style-type: none"> <li>• Women in the first half of pregnancy (unadjuvanted formulation available)</li> <li>• Other HCW</li> </ul>                                                                                                                                   | <b>November 10</b> <ul style="list-style-type: none"> <li>• Children 5 to 9 yoa with chronic conditions</li> <li>• Parents and caregivers of infants &lt; 6 moa</li> </ul> <b>November 12</b> <ul style="list-style-type: none"> <li>• Children 10 to 17 yoa with chronic conditions</li> <li>• Adults 55 to 64 yoa with chronic conditions</li> </ul> <b>November 13</b> <ul style="list-style-type: none"> <li>• Adults 45 to 54 yoa with chronic conditions</li> </ul> <b>November 14</b> <ul style="list-style-type: none"> <li>• Adults 18 to 44 yoa with chronic conditions</li> <li>• Household contacts of persons who cannot be immunized</li> </ul> | <b>November 9</b> <ul style="list-style-type: none"> <li>• Adults ≥ 65 yoa in health care institutions</li> <li>• First responders and frontline workers in adult and youth facilities</li> </ul>                                                                                                                                                                                          | <b>November 10</b> <ul style="list-style-type: none"> <li>• People with chronic conditions 6 moa to &lt; 65 yoa</li> </ul> <b>November 12</b> <ul style="list-style-type: none"> <li>• Children 5 to 19 yoa</li> </ul>       |
| Week 46<br>Nov 15-21,<br>2009 | <b>November 16</b> <ul style="list-style-type: none"> <li>• People ≥ 65 yoa with chronic conditions</li> <li>• Healthy children 5 to 18 yoa</li> <li>• First responders not covered above</li> </ul> <b>November 19</b> <ul style="list-style-type: none"> <li>• General population</li> </ul>         | <b>November 16</b> <ul style="list-style-type: none"> <li>• HCW and first responders</li> </ul> <b>November 17</b> <ul style="list-style-type: none"> <li>• Adults &gt; 75 yoa and spouses/partners</li> </ul> <b>November 19</b> <ul style="list-style-type: none"> <li>• Adults ≥ 65 yoa and spouses/partners</li> </ul> <b>November 20</b> <ul style="list-style-type: none"> <li>• Healthy children 5 to 18 yoa and their household contacts</li> </ul>                                                                                                                                                                                                   | <b>November 16</b> <ul style="list-style-type: none"> <li>• Children ≤ 13 yoa</li> <li>• Adults ≥ 65 yoa with chronic conditions</li> </ul> <b>November 19</b> <ul style="list-style-type: none"> <li>• General population</li> </ul>                                                                                                                                                      | <b>November 20</b> <ul style="list-style-type: none"> <li>• Adults ≥ 65 yoa</li> </ul>                                                                                                                                       |
| Week 47<br>Nov 22-28,<br>2009 |                                                                                                                                                                                                                                                                                                        | <b>November 23</b> <ul style="list-style-type: none"> <li>• General population</li> </ul>                                                                                                                                                                                                                                                                                                                                                                                                                                                                                                                                                                     |                                                                                                                                                                                                                                                                                                                                                                                            | <b>November 25</b> <ul style="list-style-type: none"> <li>• General population</li> </ul>                                                                                                                                    |

\*NOTE: Sequencing was cumulative – those included earlier in the campaign remained eligible in subsequent weeks.

HCW = health care worker; yoa = years of age; moa = months of age.

## **Appendix B – Laboratory methods by province November 1 - December 31, 2009**

### **1. BRITISH COLUMBIA**

In British Columbia all respiratory specimens were first tested for all influenza A viruses by a single real-time reverse transcription-PCR (RT-PCR) targeting the matrix (M) gene[1] with the addition of a second probe specific for pH1N1 (**VIC-aaagacactttccagtctc-MGB-NFQ**). Sub-typing for seasonal human influenza A (A/H1 or A/H3) was performed by real-time RT-PCR targeting the HA gene (CDC real-time PCR protocol). Specimens in which influenza A could not be detected were then tested by the Luminex RVP Assay (Luminex, Canada) which detects common respiratory viruses including seasonal influenza A and B viruses[2,3].

### **2. ALBERTA:**

In Alberta, all specimens were tested by an RT-PCR to the M gene of influenza A[4] followed by the Luminex RVP Assay. Although pandemic influenza A/H1N1 is detected in the RVP assay it is reported as non-typable. All influenza A positives arising from the screening singleplex RT-PCR and non-typables from the Luminex RVP were tested in the in-house subtyping assay for pandemic influenza A/H1N1 [5].

### **3. ONTARIO:**

Testing for seasonal influenza consisted of screening using an RT-PCR assay targeting the matrix (M) gene of influenza A virus[1,2,5] and the NS1 gene of influenza B virus (CDC real-time RT-PCR protocol). Sub-typing for seasonal human influenza A (A/H1 or A/H3) was performed by real-time RT-PCR targeting the HA gene (CDC protocol). Specimens were also tested using a multiplex molecular kit (Luminex<sup>®</sup> RVP or Seplex<sup>®</sup> RV) in addition to the CDC real-time RT-PCR assay. Specimens were prospectively tested for influenza A alone by the screening real-time RT-PCR assay and were retrospectively tested for influenza B by real-time RT-PCR or a multiplex molecular kit. Influenza A positive specimens were subtyped by realtime RT-PCR. The A/H1 and A/H3 subtypes were detected as described above. Pandemic influenza A/H1N1 was confirmed using an in-house real-time RT-PCR targeting the HA gene segment using the forward primer **cctgggaaatccagagtgtga**, reverse primer **cgttcattgtctgaactagrtgtt** and probe **tcactctccacagcaagctcatgg**.

### **4. QUEBEC**

All respiratory samples were tested using real-time RT-PCR TaqMan based assays targeting M gene sequences conserved among influenza A virus, the NS1 gene of influenza B virus and M gene specific sequences of the pandemic influenza A/H1N1 subtype. Influenza A positive, pandemic H1N1 negative samples were further tested for seasonal human influenza A (A/H1 or A/H3) by real-time TaqMan RT-PCR targeting the HA gene. All protocols but the pandemic H1N1 assay were according to CDC methods distributed via the Association of Public Health Laboratories. The pandemic influenza A/H1N1 protocol was an in-house developed TaqMan based RT-PCR assay using primers **tagacgctttgtccaaaatg** and **tgaatagcttagtacacctcc** and the probe **accgaacaacatggatagagcagtta**.

**References for laboratory methods:**

1. Fouchier, R.A, Bestebroer, TM, Herfst S, Van Der Kemp L, Rimmelzwaan GF et al. (2000) Detection of influenza A viruses from different species by PCR amplification of conserved sequences in the matrix gene. *J. Clin. Microbiol.* 38:4096–4101.
2. Mahony JS, Chong F, Merante S, Yaghoubian T, Sinha C, et al. Development of a respiratory virus panel test for detection of twenty human respiratory viruses by use of multiplex PCR and a fluid microbead-based assay. *J. Clin. Microbiol.* 2007;45:2965-2970.
3. Mahony JB, Hatchette T, Ojkic D, Drews SJ, Gubbay J, et al. Multiplex PCR tests sentinel the appearance of pandemic influenza viruses including H1N1 swine influenza. *J Clin Virol* 2009;45:200-202.
4. Novel Swine-Origin Influenza A (H1N1) Virus Investigation Team. Emergence of a novel swine-origin influenza A (H1N1) virus in humans *N Engl J Med.* 2009;360:2605-15
5. Pabbaraju K, Wong S, Wong AA, Appleyard GD, Chui L et al. Design and validation of real-time reverse transcription-PCR assays for detection of pandemic (H1N1) 2009 virus. *J Clin Microbiol* 2009;47:3454-60.

**Appendix C – Characteristics of controls by pandemic H1N1 vaccine status during the primary analysis period spanning illness onset from week 45 (November 8, 2009) through week 48 (December 5, 2009)**

|                                           | <b>Vaccinated<sup>a</sup><br/>against<br/>pandemic H1N1</b> | <b>Not vaccinated<sup>b</sup><br/>against pandemic<br/>H1N1</b> | <b>Overall</b> |
|-------------------------------------------|-------------------------------------------------------------|-----------------------------------------------------------------|----------------|
|                                           | <b>n/N (%)</b>                                              | <b>n/N (%)</b>                                                  | <b>n/N (%)</b> |
| <b>Age category</b>                       | 58                                                          | 285                                                             | 343            |
| 6 months - 9 years                        | 22 (38)                                                     | 49 (17)                                                         | 71 (21)        |
| 10 -19 years                              | 3 (5)                                                       | 53 (19)                                                         | 56 (16)        |
| 20 - 49 years                             | 21 (36)                                                     | 127 (45)                                                        | 148 (43)       |
| 50 - 64 years                             | 11 (19)                                                     | 36 (13)                                                         | 47 (14)        |
| 65+ years                                 | 1 (2)                                                       | 20 (7)                                                          | 21 (6)         |
| Median (Range), years                     | 22 (<1 -88)                                                 | 27 (<1-87)                                                      | 27 (<1 -88)    |
| <b>Sex</b>                                |                                                             |                                                                 |                |
| Female                                    | 37 (64)                                                     | 163 (57)                                                        | 200 (58)       |
| Male                                      | 20 (34)                                                     | 117 (41)                                                        | 137 (40)       |
| Unknown                                   | 1 (2)                                                       | 5 (2)                                                           | 6 (2)          |
| <b>Chronic Conditions</b>                 |                                                             |                                                                 |                |
| No                                        | 37 (64)                                                     | 226 (79)                                                        | 263 (77)       |
| Yes                                       | 21 (36)                                                     | 59 (21)                                                         | 80 (23)        |
| <b>Province</b>                           |                                                             |                                                                 |                |
| Alberta                                   | 11 (19)                                                     | 55 (19)                                                         | 66 (19)        |
| British Columbia                          | 19 (33)                                                     | 114 (40)                                                        | 133 (39)       |
| Ontario                                   | 7 (12)                                                      | 24 (8)                                                          | 31 (9)         |
| Quebec                                    | 21 (36)                                                     | 92 (32)                                                         | 113 (33)       |
| <b>Received 2009-10 seasonal vaccine</b>  |                                                             |                                                                 |                |
| No                                        | 14 (52)                                                     | 179 (95)                                                        | 193 (90)       |
| Yes                                       | 13 (48)                                                     | 9 (5)                                                           | 22 (10)        |
| <b>Received 2008-09 seasonal vaccine*</b> |                                                             |                                                                 |                |
| No                                        | 14 (35)                                                     | 199 (78)                                                        | 213 (72)       |
| Yes                                       | 26 (65)                                                     | 57 (22)                                                         | 83 (28)        |
| <b>Specimen collection interval</b>       |                                                             |                                                                 |                |
| ≤4 days                                   | 46 (79)                                                     | 251 (88)                                                        | 297 (87)       |
| >4 days                                   | 12 (21)                                                     | 34 (12)                                                         | 46 (13)        |
| Median (Range), days                      | 3 (0-7)                                                     | 2 (0-7)                                                         | 2 (0-7)        |

NOTE: Inclusion criteria as specified in Table 1 of main manuscript apply to this table. Participants who received vaccine within 2 weeks of illness onset excluded from the analysis.

<sup>a</sup>Received vaccine ≥2weeks prior to onset of influenza-like illness

<sup>b</sup>Did not receive vaccine

\*Excludes children too young to have received the 2008-09 seasonal vaccine
